# Supplementary material for: Soluble CD14 produced by bovine mammary epithelial cells modulates their response to full length LPS
Source: PubMed Central journal article supplement (PMC11170775; doi:10.1186/s13567-024-01329-3), 2024-06-12
Supplement: 13567_2024_1329_MOESM2_ESM.pdf [file 13567_2024_1329_MOESM2_ESM.pdf]

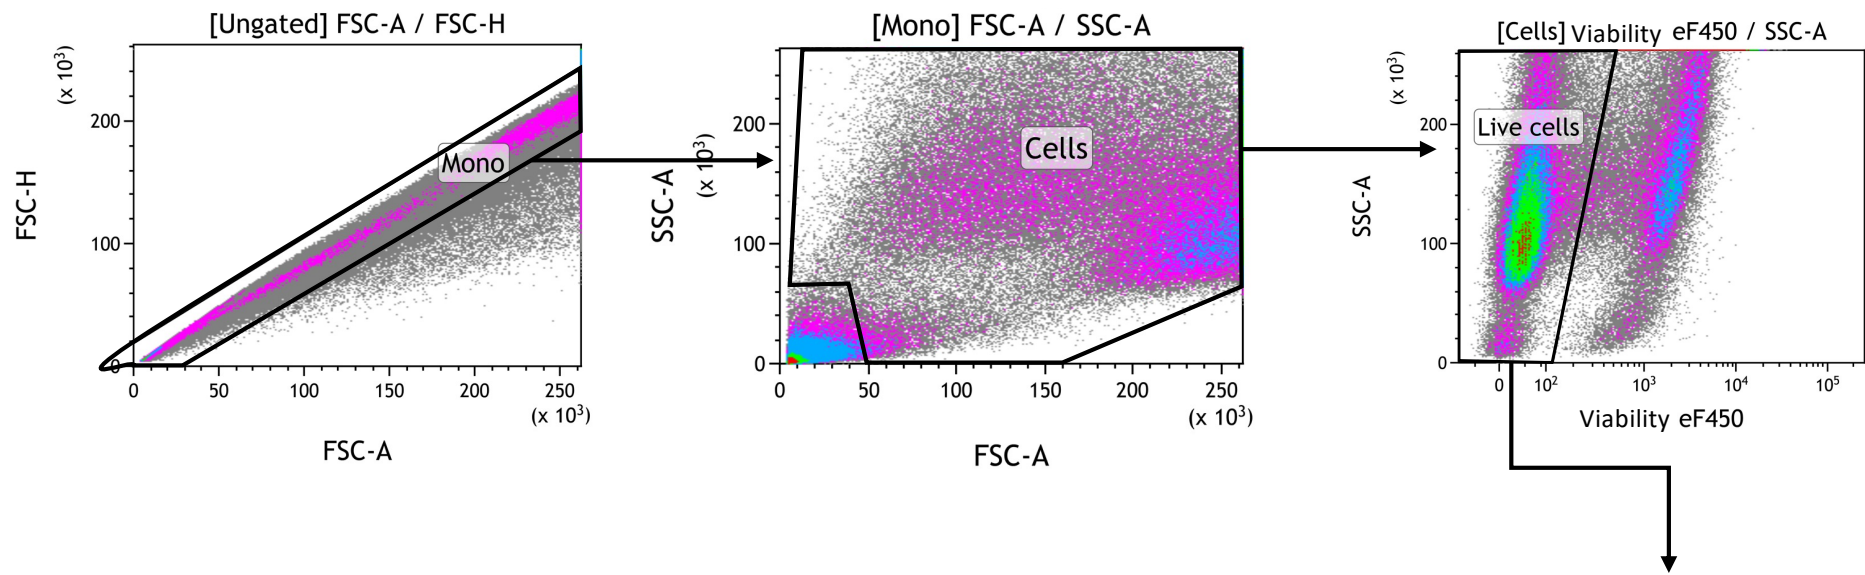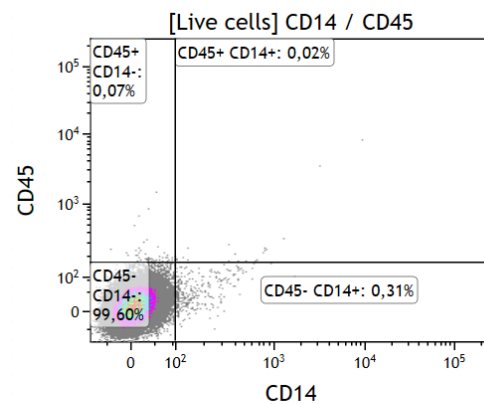

| Gate        | Number  | %Total | %Gated |
|-------------|---------|--------|--------|
| All         | 101 005 | 25,25  | 100,00 |
| CD45- CD14- | 100 598 | 25,15  | 99,60  |
| CD45- CD14+ | 317     | 0,08   | 0,31   |
| CD45+ CD14- | 68      | 0,02   | 0,07   |
| CD45+ CD14+ | 22      | 0,01   | 0,02   |
