# Supplementary material for: Soluble CD14 produced by bovine mammary epithelial cells modulates their response to full length LPS
Source: PubMed Central journal article supplement (PMC11170775; doi:10.1186/s13567-024-01329-3), 2024-06-12

A-

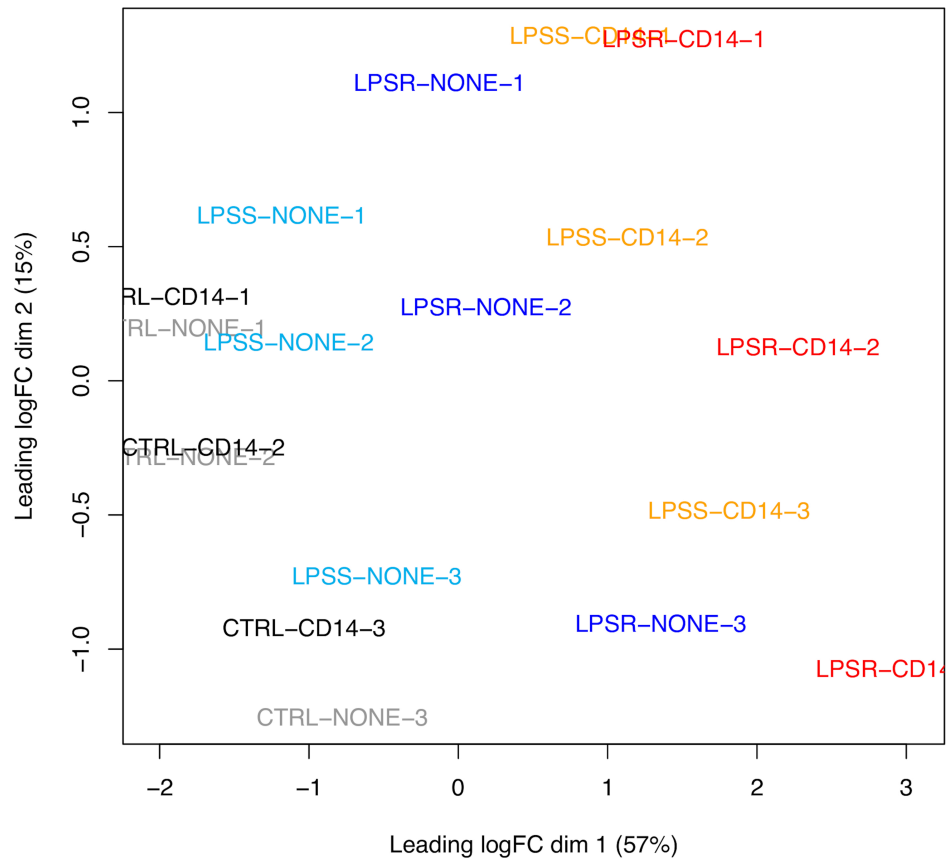

B-

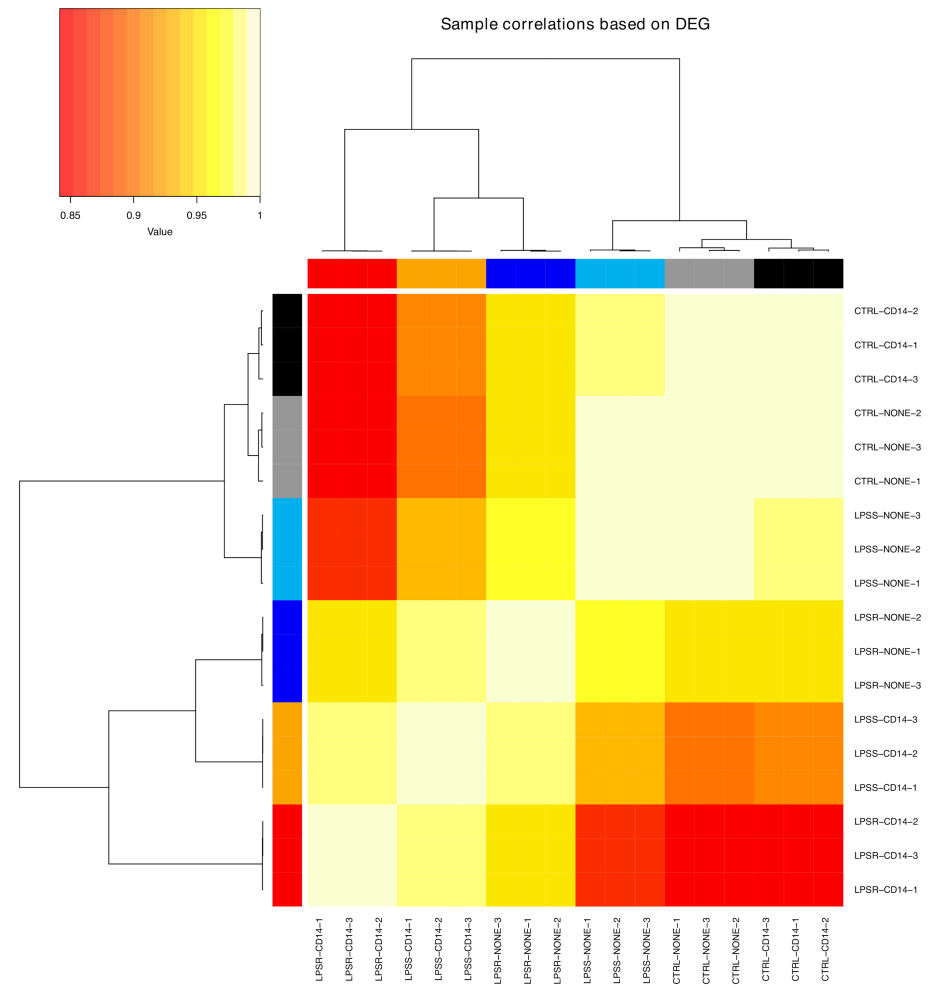

Supplement: 13567_2024_1329_MOESM3_ESM.pdf [file 13567_2024_1329_MOESM3_ESM.pdf]
