# Supplementary material for: Soluble CD14 produced by bovine mammary epithelial cells modulates their response to full length LPS
Source: PubMed Central journal article supplement (PMC11170775; doi:10.1186/s13567-024-01329-3), 2024-06-12

CYTOKINE-CYTOKINE RECEPTOR INTERACTION

Chemokines

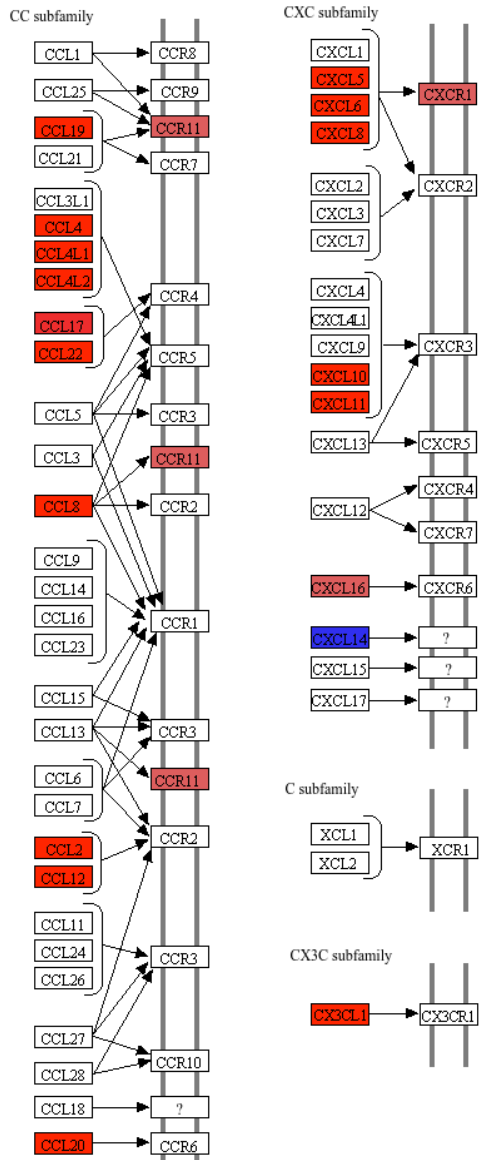

The class I helical cytokines  
γ-chain utilising

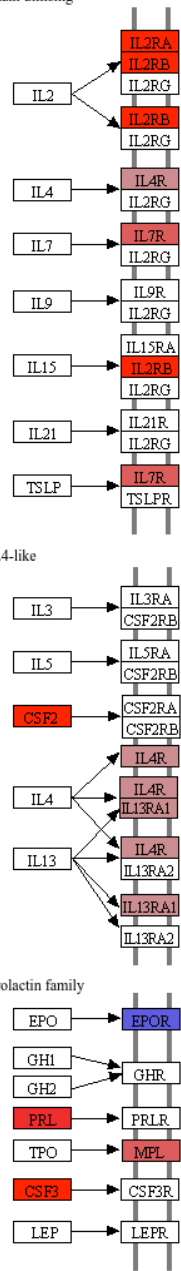

IL6/12-like

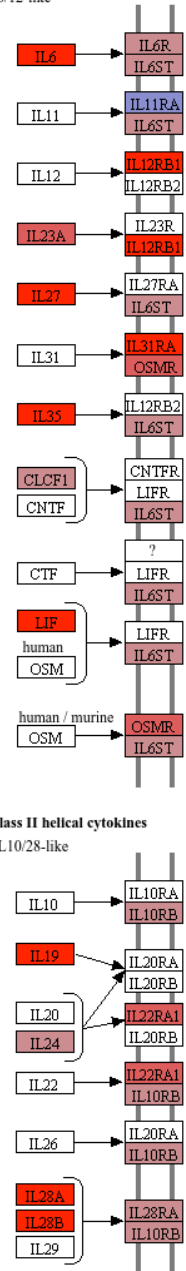

Interferon family

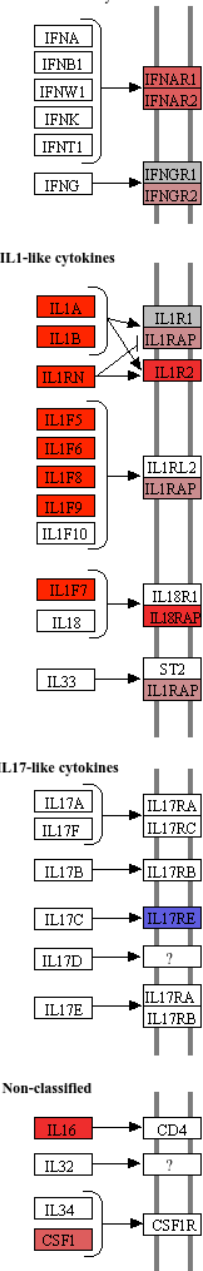

TNF Family

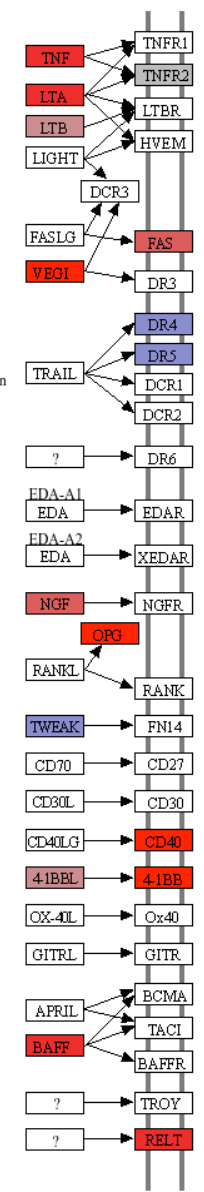

TGF-β family

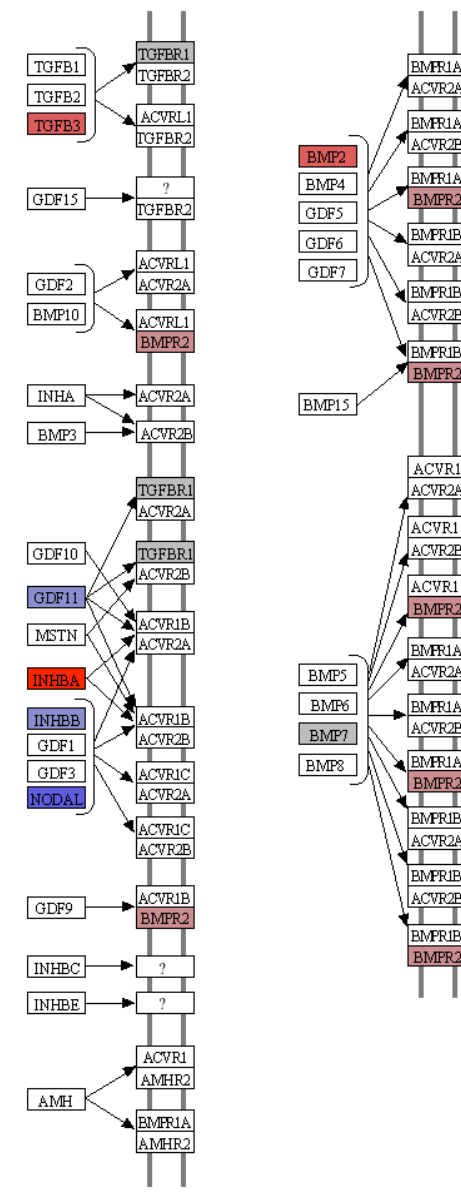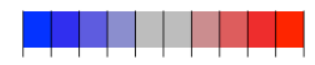

Supplement: 13567_2024_1329_MOESM8_ESM.pdf [file 13567_2024_1329_MOESM8_ESM.pdf]
